# Supplementary material for: Variation and Trend of Nitrate radical reactivity towards volatile organic compounds in Beijing, China
Source: Copernicus journal article supplement (doi:10.5194/egusphere-2023-622), 2023-04-17
Supplement: Supplementary file 1 [file egusphere-2023-622-supplement.pdf]

## **Supplement.**

### **Variation and Trend of Nitrate radical reactivity towards volatile organic compounds in Beijing, China**

Hejun Hu et al.,

*Correspondence to:* Haichao Wang (wanghch27@mail.sysu.edu.cn), Keding Lu (k.lu@pku.edu.cn)

#### **Content:**

Figure S1-S13

Table S1-S4

References

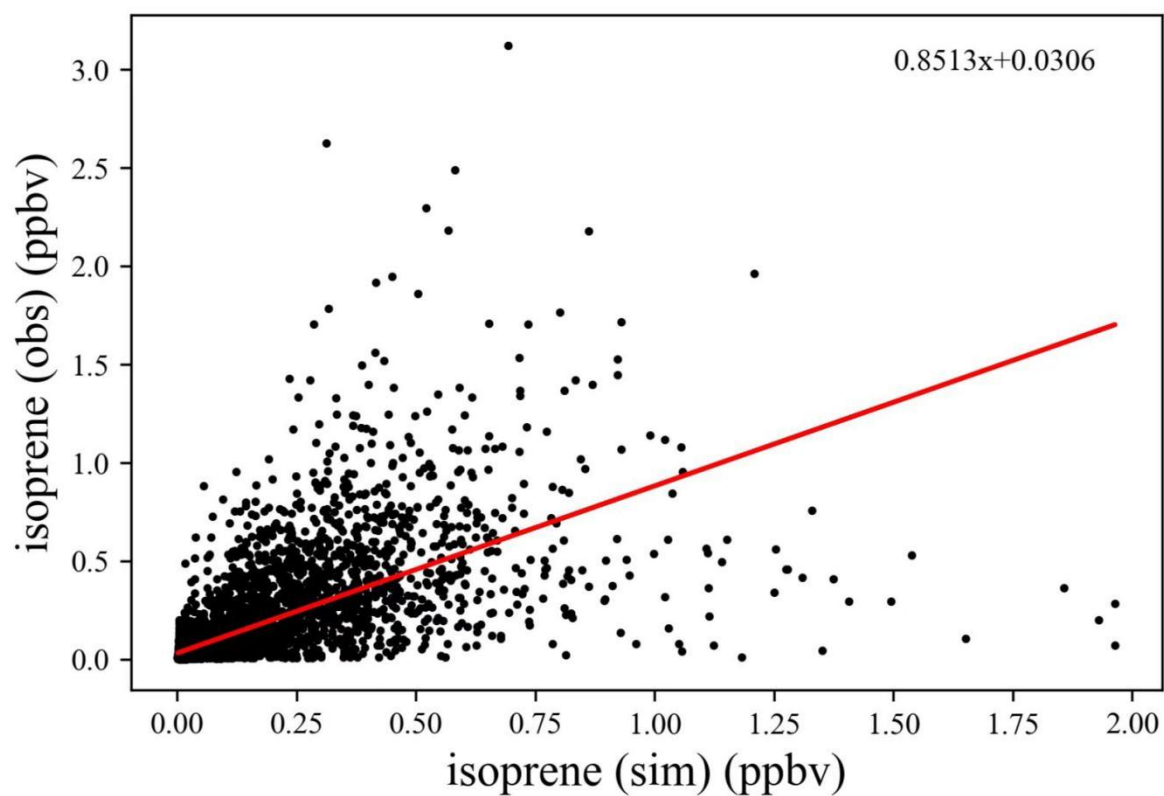

**Figure S1.** The intercomparing of measured and simulated isoprene in year 2019 in urban Beijing, which shows the overall overestimation of the modelling result compared with the observation.

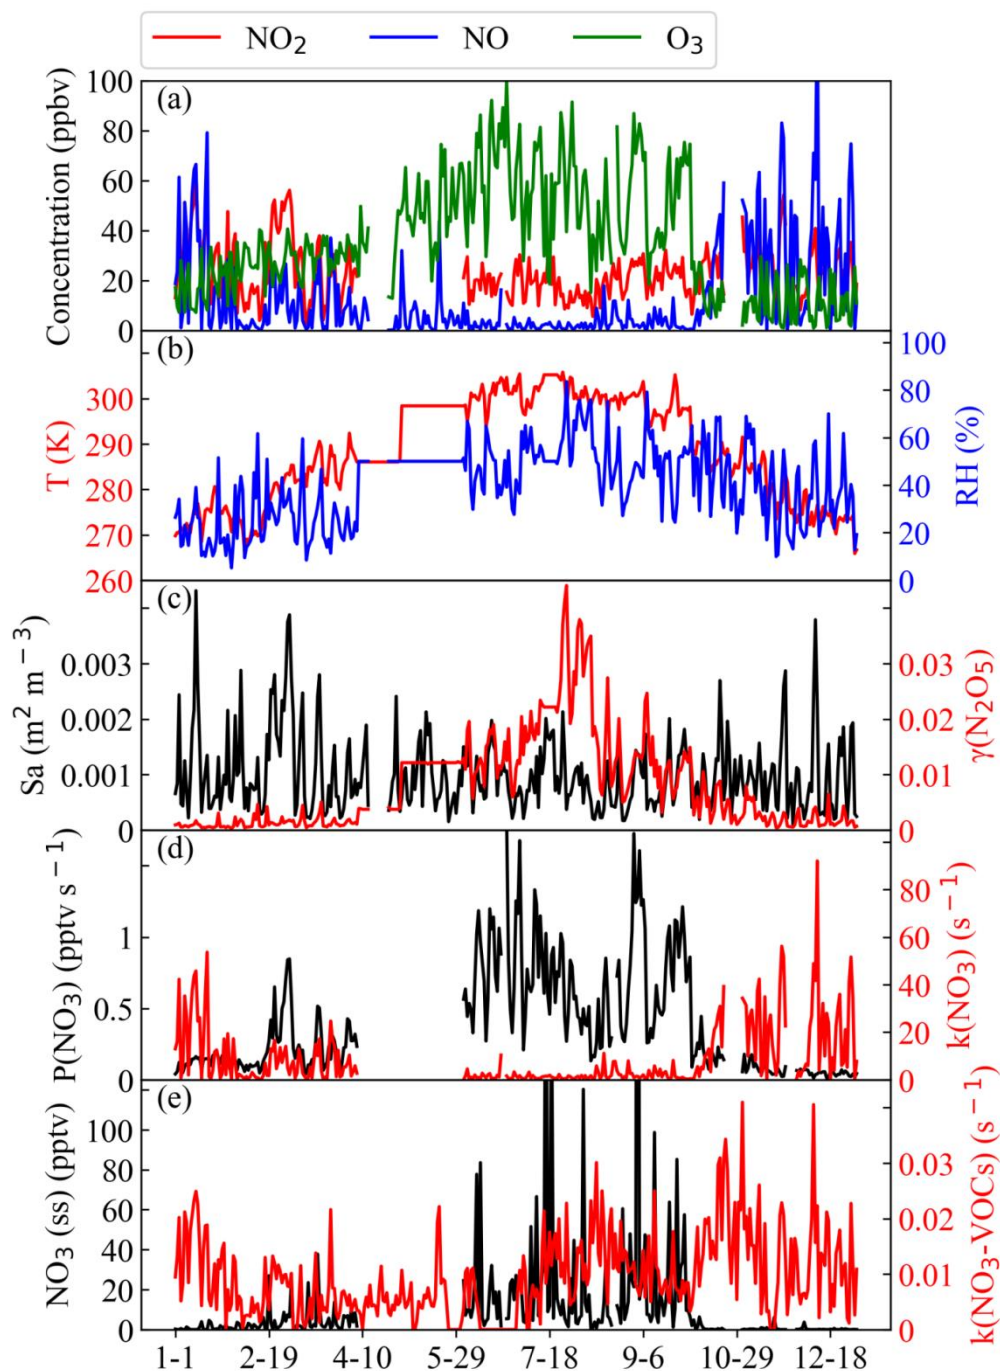

**Figure S2.** (a) Time series of concentrations of NO, NO<sub>2</sub> and O<sub>3</sub>. (b) Time series of thermodynamic temperature and relative humidity. (c) Time series of the aerosol surface area densities and dimensionless uptake coefficients of N<sub>2</sub>O<sub>5</sub>, (d) Time series of NO<sub>3</sub> production rate and NO<sub>3</sub> loss term. (e) Time series of NO<sub>3</sub> stationary-state concentrations and the NO<sub>3</sub> loss term through the reaction with VOC (actual NO<sub>3</sub> reactivity towards VOC). All the data were averaged with the time resolution of 1 day.

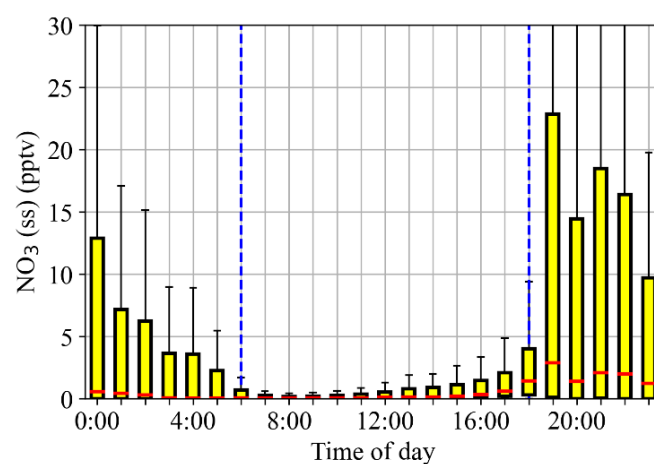

**Figure S3.** Median diel profile of the estimated  $\text{NO}_3$  concentrations. The yellow boxes, the red lines and the black lines represent the box diagrams (25-75 percentiles), the median values and the error bars ( $\pm$  standard deviation) of  $\text{NO}_3$  concentrations, respectively. Daytime and nighttime data are divided by the blue dotted lines.

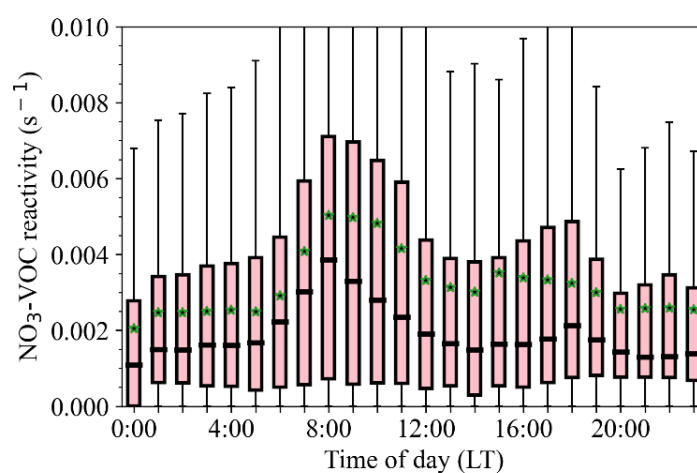

**Figure S4.** The box whisker plot of  $\text{NO}_3$  reactivity towards VOC on annual average. The pink parts represent the variation range from 25 to 75 quantiles; The black bars represent error bars ( $\pm$  standard deviations) of the  $\text{NO}_3$  reactivity towards VOC; The green asterisks and the black lines represent the average and the median value, respectively.

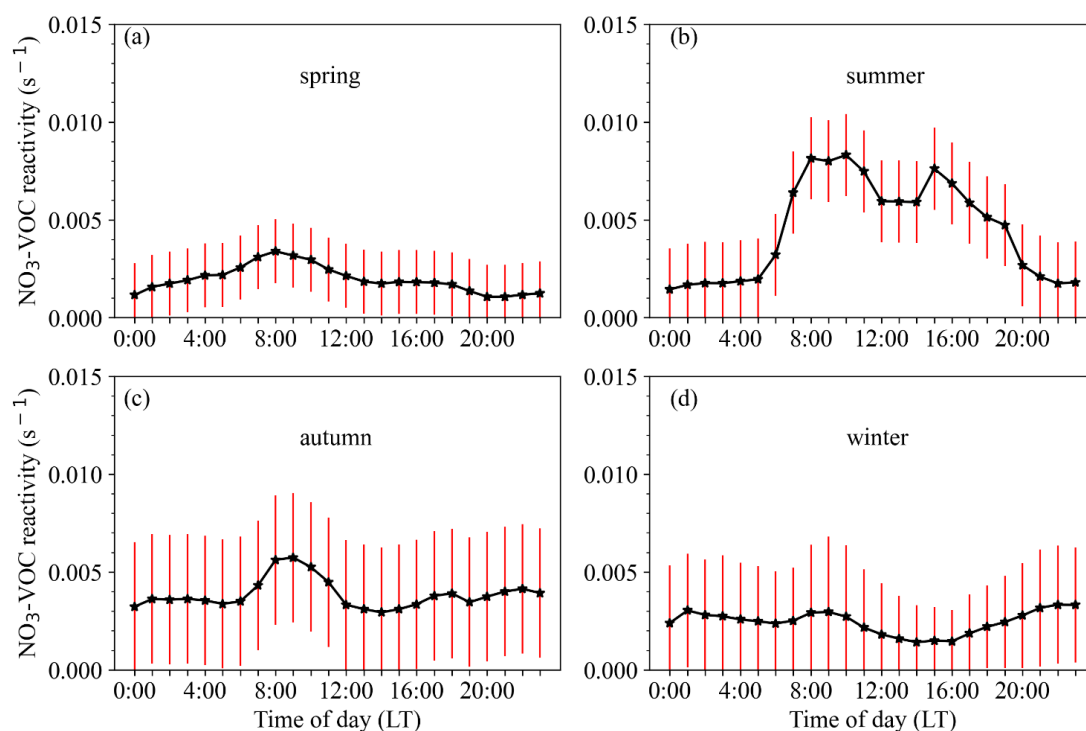

**Figure S5.** The season-averaged diel profiles of  $k_{\text{NO}_3}$ . (a) - (d) respectively represent the mean diurnal profiles of  $k_{\text{NO}_3}$  in four seasons. The red lines represent the error bars ( $\pm$  standard deviations) of the reactivity.

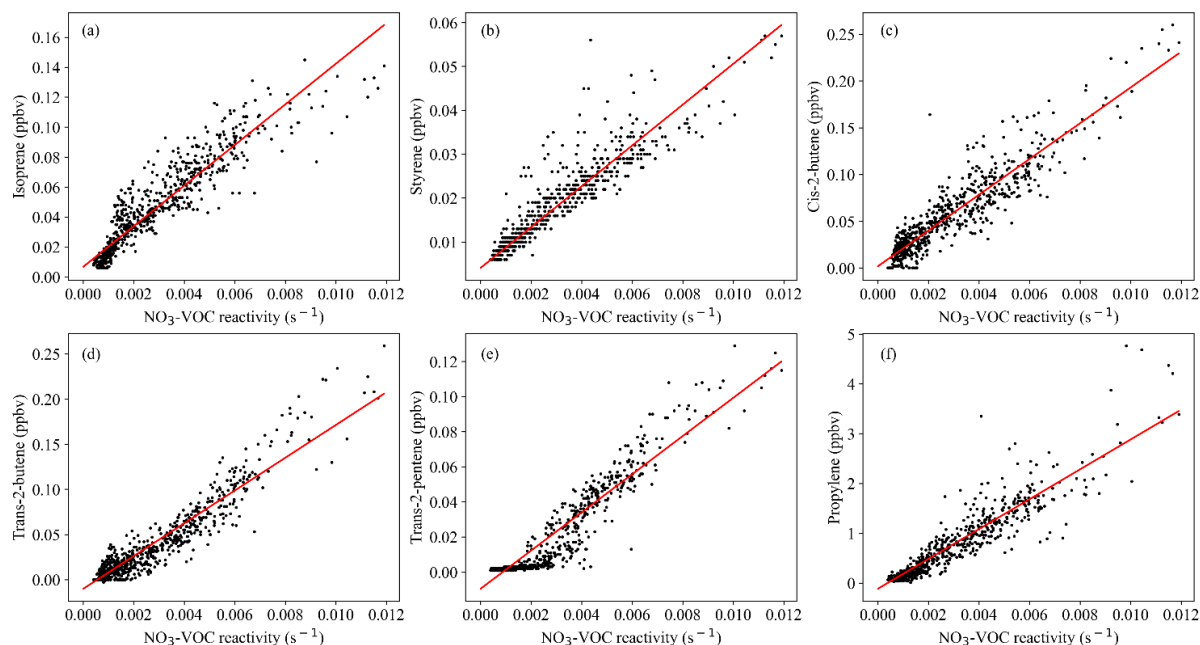

**Figure S6.** The correlation between the concentrations of isoprene, styrene, cis-2-butene, trans-2-butene, trans-2-pentene, propylene and  $\text{NO}_3$  reactivity towards VOC. The black dots are the scattered points and the red lines are the fitting lines, the detailed correlation coefficients are summarized in Table S2.

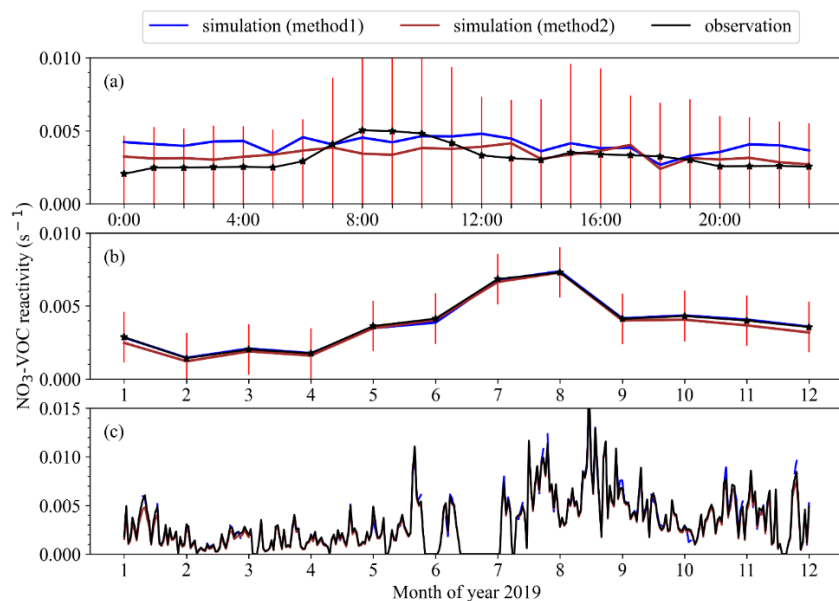

**Figure S7.** (a) is a campaign-averaged diel profile (time resolution = 1 hour) of measured  $\text{NO}_3$  reactivity toward VOC and the reactivity estimated by the two parameterization methods. (b) is a mean monthly profile of measured  $\text{NO}_3$  reactivity toward VOC and the reactivity estimated by the two parameterization methods. The red lines are error bars of measured  $\text{NO}_3$  reactivity towards VOC. (c) depicts the time series of measured daily  $\text{NO}_3$  reactivity toward VOC and the reactivity estimated by the two parameterization methods. The red lines are error bars of measured  $\text{NO}_3$  reactivity towards VOC.

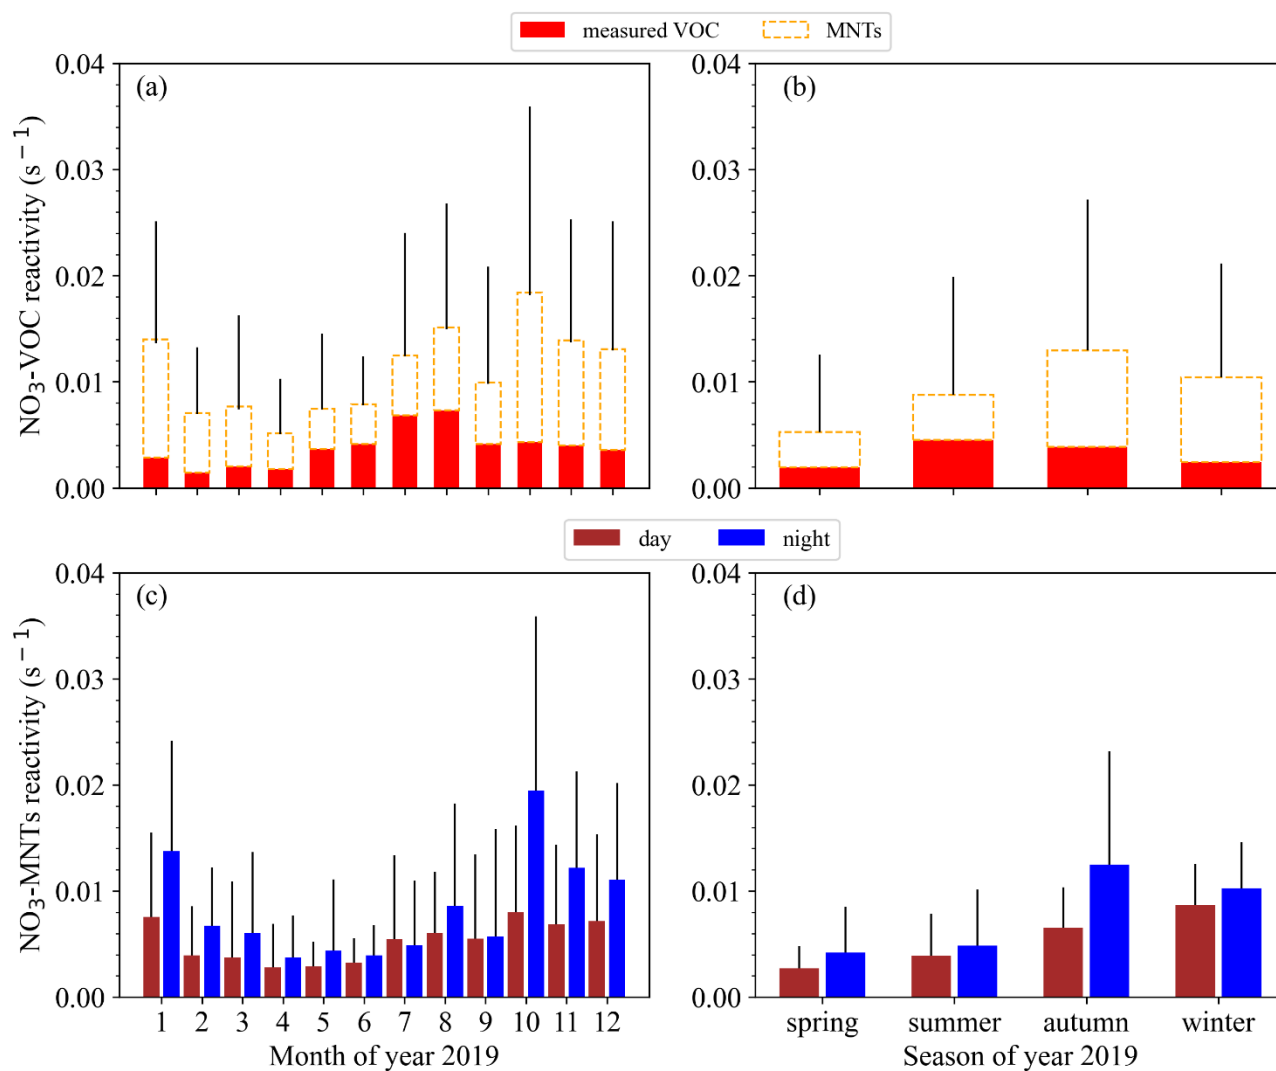

**Figure S8.** The histograms of monthly (a) and seasonal-averaged (b)  $\text{NO}_3$  reactivity towards estimated MNTs. The black lines are the error lines (+ standard deviation) of  $\text{NO}_3$  reactivity towards MNTs (thick lines). The histograms of monthly (c) and seasonal-averaged (d)  $\text{NO}_3$  reactivity towards MNTs divided into daytime and nighttime data. The black lines are the error lines (+ standard deviation) of  $\text{NO}_3$  reactivity towards MNTs.

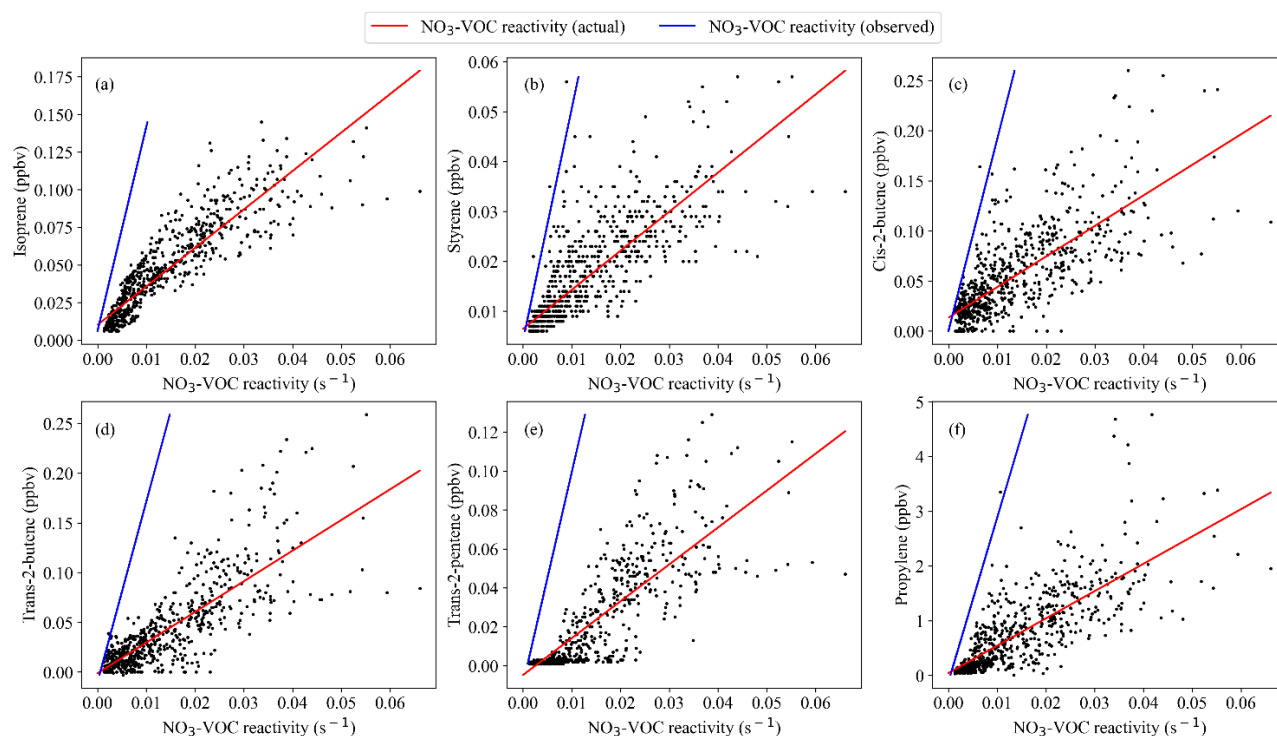

**Figure S9.** (a) - (f) respectively depict the correlation plots of key VOC concentrations and the actual  $\text{NO}_3$  reactivity (w/ MTs) towards VOC in January. The black dots are the scattered points the red lines are the fitting lines. To aid comparison, the fitting lines of the observed reactivity (w/o MTs) are also plotted (blue).



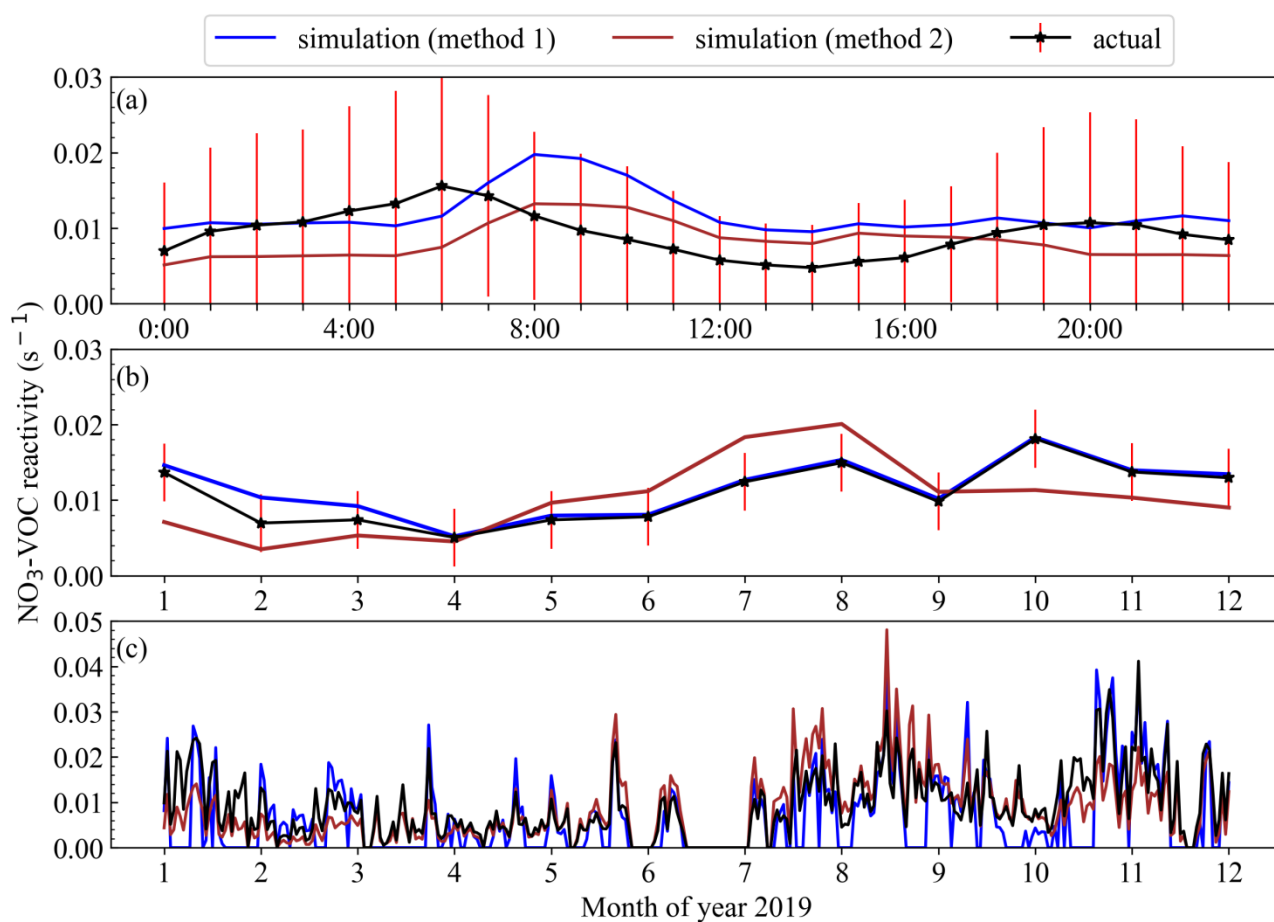

**Figure S10.** (a) is a campaign-averaged diel profile (time resolution = 1 hour) of actual  $\text{NO}_3$  reactivity toward VOC (including monoterpenes) and the actual reactivity estimated by the two parameterization methods. (b) is a mean monthly profile of actual  $\text{NO}_3$  reactivity toward VOC and the reactivity estimated by the two parameterization methods. The red lines are error bars of actual  $\text{NO}_3$  reactivity towards VOC. (c) depicts the time series with time resolution of one day of actual  $\text{NO}_3$  reactivity toward VOC and the reactivity estimated by the two parameterization methods. The red lines are error bars of actual  $\text{NO}_3$  reactivity toward VOC.

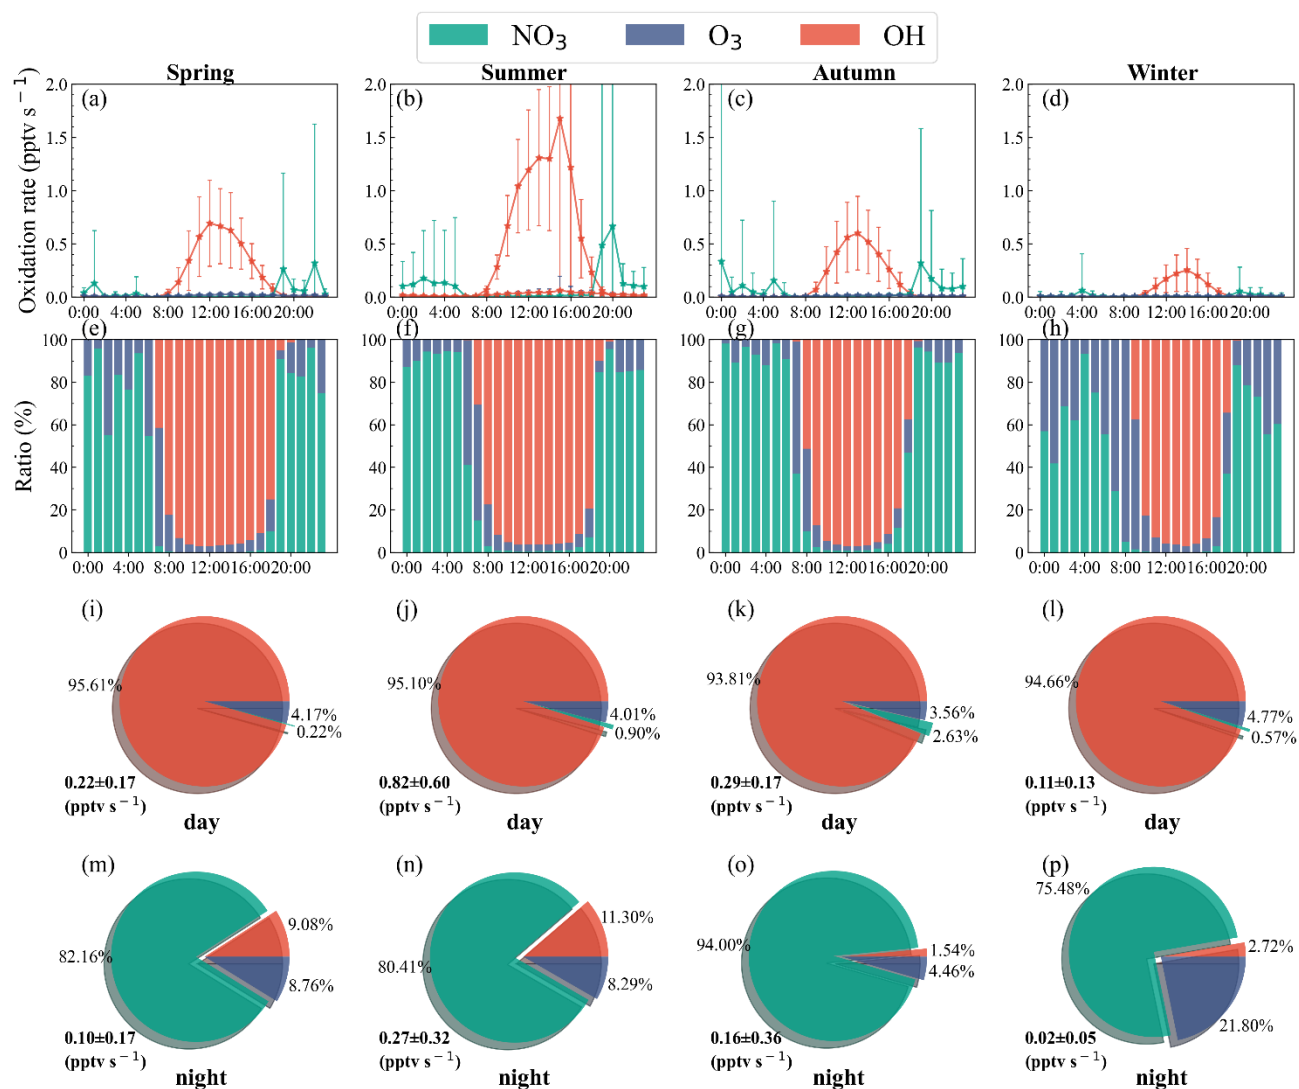

**Figure S11.** (a-d) Median diurnal profiles of VOC oxidation rate by atmospheric oxidants in different seasons. The error bars ( $\pm$  standard deviation) are plotted. (e-h) Fractions of VOC oxidation rate by atmospheric oxidants in different seasons. The oxidation fraction by different oxidants is differentiated by colors. (i-p) Pie charts representing the daytime and the nighttime VOC oxidation rate by OH, NO<sub>3</sub> and O<sub>3</sub> during different seasons, with the averaged values and standard deviations.

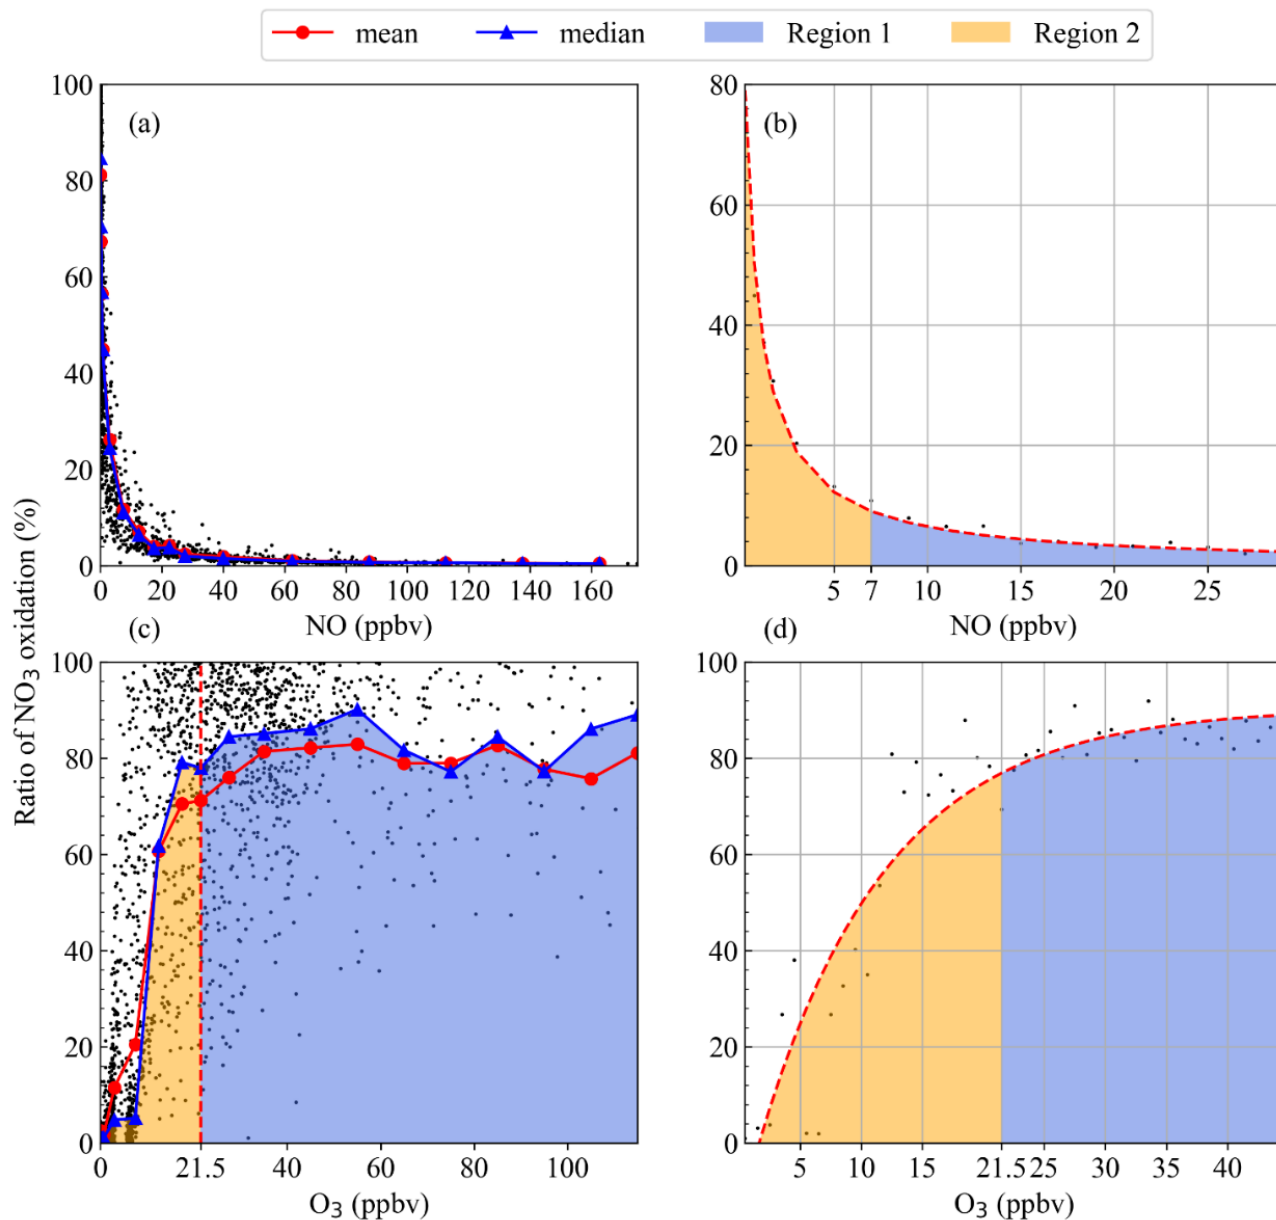

**Figure S12.** Fitting diagrams between ratios of nighttime VOC oxidized by  $\text{NO}_3$  and concentrations of NO (a and b) and  $\text{O}_3$  (c and d). The colored regions indicate the different effects of NO or  $\text{O}_3$  concentrations on the ratios. Region 1 and region 2 respectively represent “strong effect” and the “weak effect” of NO or  $\text{O}_3$  concentrations.

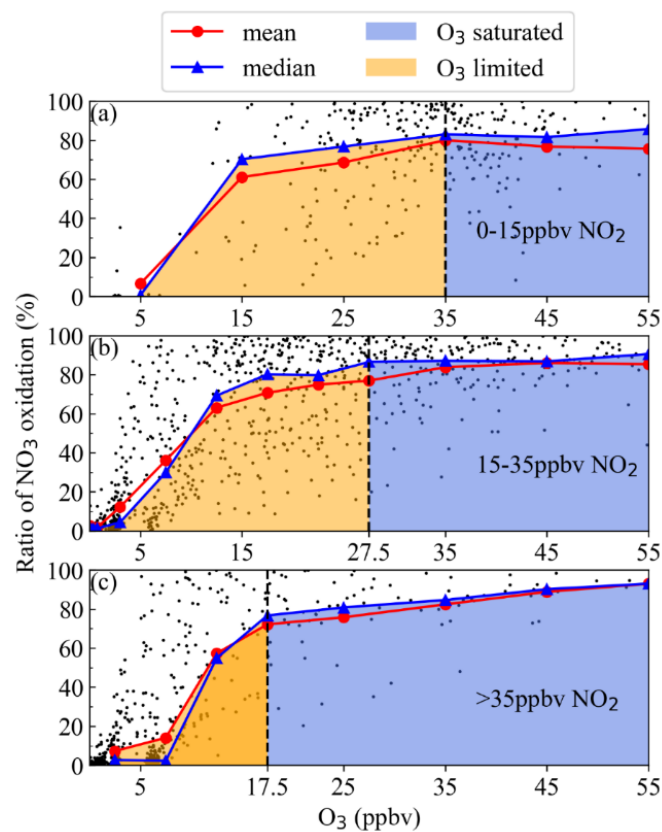

**Figure S13.** (a) (b) (c) respectively depict the fitting diagrams between the ratio of nighttime VOC oxidized by NO<sub>3</sub> and O<sub>3</sub> concentrations existing in different NO<sub>2</sub> concentrations. To aid comparison, the NO<sub>2</sub> concentrations and the threshold values of O<sub>3</sub> are marked in the figures. Colored regions represent different effects of O<sub>3</sub> concentrations donated in the legend.

**Table S1.** Reaction rate coefficients of VOC with NO<sub>3</sub> used in our study

| VOC                    | k (298K)<br>(10 <sup>15</sup> cm <sup>3</sup> molecule <sup>-1</sup> s <sup>-1</sup> ) | A Factor<br>(10 <sup>12</sup> cm <sup>3</sup> molecule <sup>-1</sup> s <sup>-1</sup> ) | Ea/R<br>(K) | Ref |
|------------------------|----------------------------------------------------------------------------------------|----------------------------------------------------------------------------------------|-------------|-----|
| ethane                 | 0.005                                                                                  | /                                                                                      | /           | 1   |
| ethylene               | 0.210                                                                                  | 3.3                                                                                    | 2880        | 2   |
| propane                | 0.035                                                                                  | /                                                                                      | /           | 1   |
| propylene              | 9.490                                                                                  | 0.459                                                                                  | 1156        | 1   |
| isobutane              | 0.106                                                                                  | 3.05                                                                                   | 3060        | 2   |
| n-butane               | 0.046                                                                                  | 2.76                                                                                   | 3279        | 1   |
| acetylene              | 0.210                                                                                  | /                                                                                      | /           | 4   |
| trans-2-butene         | 390                                                                                    | 0.390                                                                                  | 0           | 2   |
| 1-butene               | 13.5                                                                                   | 0.314                                                                                  | 938         | 1   |
| cis-2-butene           | 352                                                                                    | /                                                                                      | /           | 1   |
| cyclopentane           | 0.140                                                                                  | 0.00014                                                                                | 0           | 2   |
| isopentane             | 0.162                                                                                  | 2.99                                                                                   | 2927        | 2   |
| n-pentane              | 0.087                                                                                  | /                                                                                      | /           | 1   |
| 1-pentene              | 15                                                                                     | /                                                                                      | /           | 1   |
| trans-2-pentene        | 390                                                                                    | 0.390                                                                                  | 0           | 2   |
| Isoprene               | 700                                                                                    | 3.15                                                                                   | 450         | 1   |
| cis-2-pentene          | 350                                                                                    | 0.350                                                                                  | 0           | 2   |
| 2,2-dimethylbutane     | 0.440                                                                                  | 0.00044                                                                                | 0           | 2   |
| 2,3-dimethylbutane     | 0.440                                                                                  | /                                                                                      | /           | 1   |
| 2-methylpentane        | 0.180                                                                                  | /                                                                                      | /           | 1   |
| 3-methylpentane        | 0.220                                                                                  | /                                                                                      | /           | 1   |
| 1-hexene               | 0.180                                                                                  | /                                                                                      | /           | 1   |
| n-hexane               | 0.110                                                                                  | 0.00011                                                                                | 0           | 2   |
| 2,4-dimethylpentane    | 0.150                                                                                  | /                                                                                      | /           | 1   |
| methylcyclopentane     | 0.320                                                                                  | /                                                                                      | /           | 3   |
| 2-methylhexane         | 0.180                                                                                  | 0.00018                                                                                | 0           | 2   |
| cyclohexane            | 0.140                                                                                  | /                                                                                      | /           | 1   |
| 2,3-dimethylpentane    | 0.330                                                                                  | /                                                                                      | /           | 3   |
| 3-methylhexane         | 0.180                                                                                  | 0.00018                                                                                | 0           | 2   |
| Benzene                | 0.015                                                                                  | /                                                                                      | /           | 1   |
| 2,2,4-trimethylpentane | 0.090                                                                                  | /                                                                                      | /           | 1   |
| n-heptane              | 0.150                                                                                  | /                                                                                      | /           | 1   |
| methylcyclohexane      | 0.420                                                                                  | /                                                                                      | /           | 5   |
| 2,3,4-trimethylpentane | 0.440                                                                                  | /                                                                                      | /           | 3   |
| 2-methylheptane        | 0.130                                                                                  | /                                                                                      | /           | 5   |
| 3-methylheptane        | 0.160                                                                                  | /                                                                                      | /           | 5   |
| toluene                | 0.070                                                                                  | /                                                                                      | /           | 1   |
| n-octane               | 0.190                                                                                  | /                                                                                      | /           | 1   |
| ethylbenzene           | 0.300                                                                                  | /                                                                                      | /           | 1   |
| n-nonane               | 0.230                                                                                  | /                                                                                      | /           | 1   |
| m,p-xylene             | 0.380                                                                                  | /                                                                                      | /           | 1   |

|                        |       |         |      |   |
|------------------------|-------|---------|------|---|
| o-xylene               | 0.410 | /       | /    | 1 |
| styrene                | 1500  | /       | /    | 1 |
| iso-propylbenzene      | 1     | 0.001   | 0    | 2 |
| n-propylbenzene        | 1     | 0.001   | 0    | 2 |
| m-ethyltoluene         | 0.900 | 0.00090 | 0    | 2 |
| p-ethyltoluene         | 0.860 | 0.00086 | 0    | 2 |
| n-decane               | 0.280 | /       | /    | 1 |
| 1,3,5-trimethylbenzene | 0.880 | /       | /    | 1 |
| o-ethyltoluene         | 0.900 | 0.00090 | 0    | 2 |
| 1,2,4-trimethylbenzene | 1.8   | /       | /    | 1 |
| 1,2,3-trimethylbenzene | 1.9   | /       | /    | 1 |
| m-diethylbenzene       | 7     | /       | /    | 5 |
| p-diethylbenzene       | 8.6   | /       | /    | 5 |
| n-undecane             | 0.330 | /       | /    | 5 |
| n-dodecane             | 0.380 | /       | /    | 5 |
| limonene               | 12200 | /       | /    | 1 |
| $\alpha$ -pinene       | 6160  | 1.19    | -490 | 1 |
| $\beta$ -pinene        | 2510  | /       | /    | 1 |
| sabinene               | 10000 | /       | /    | 1 |
| myrcene                | 11100 | /       | /    | 1 |
| 3-carene               | 9100  | /       | /    | 1 |
| ocimene                | 22000 | /       | /    | 1 |
| 2-carene               | 19000 | /       | /    | 1 |
| acetone                | 0.015 | /       | /    | 1 |

---

**ref1:**(Atkinson and Arey, 2003)

**ref2:** (Brown et al., 2011)

**ref3:** (Ambrose et al., 2007)

**ref4:** IUPAC

**ref5:** Estimated

**Table S2.** Species contributions to NO<sub>3</sub> reactivity towards top six VOC in different seasons.

|   | Spring          |          | Summer          |          | Autumn          |          | Winter          |          |
|---|-----------------|----------|-----------------|----------|-----------------|----------|-----------------|----------|
|   | VOC             | Fraction | VOC             | Fraction | VOC             | Fraction | VOC             | Fraction |
| 1 | isoprene        | 40.04%   | isoprene        | 77.16%   | isoprene        | 43.21%   | styrene         | 39.77%   |
| 2 | styrene         | 37.86%   | styrene         | 11.95%   | styrene         | 36.09%   | isoprene        | 20.42%   |
| 3 | trans-2-butene  | 7.76%    | cis-2-butene    | 4.20%    | cis-2-butene    | 6.00%    | cis-2-butene    | 11.95%   |
| 4 | cis-2-butene    | 4.27%    | trans-2-butene  | 3.51%    | trans-2-butene  | 4.85%    | trans-2-butene  | 4.85%    |
| 5 | propylene       | 2.05%    | propylene       | 0.67%    | trans-2-pentene | 2.81%    | trans-2-pentene | 2.81%    |
| 6 | trans-2-pentene | 1.75%    | trans-2-pentene | 0.39%    | propylene       | 1.72%    | propylene       | 1.72%    |

**Table S3.** Correlation coefficients and fitting equations between VOC concentrations and  $k_{\text{NO}_3}$  in each month (where y represents VOC concentrations (ppbv), x represents the reactivity ( $\text{s}^{-1}$ )). We selected the indicators with the best correlation coefficients.

| VOC             | Jan    |                 | Feb    |                 | Mar    |                 | Apr    |                  |
|-----------------|--------|-----------------|--------|-----------------|--------|-----------------|--------|------------------|
|                 | R      | equation        | R      | equation        | R      | equation        | R      | equation         |
| isoprene        | 0.92   | y=13.56x+0.0068 | 0.92   | y=15.74x+0.0017 | 0.83   | y=10.09x+0.0035 | 0.66   | y=7.02x+0.011    |
| styrene         | 0.92   | y=4.65x+0.0041  | 0.88   | y=5.41x+0.002   | 0.96   | y=15.69x-0.0011 | 0.98   | y=18.79x-0.008   |
| cis-2-butene    | 0.92   | y=19.13x+0.0017 | 0.82   | y=22.56x-0.0004 | 0.87   | y=7.44x-0.0018  | 0.74   | y=5.50x+0.0011   |
| trans-2-butene  | 0.94   | y=18.15x-0.010  | 0.88   | y=14.69x-0.005  | 0.83   | y=8.58x-0.0014  | 0.58   | y=5.89x+0.0065   |
| trans-2-pentene | 0.95   | y=10.89x-0.0096 | 0.82   | y=7.21x-0.004   | 0.77   | y=4.42x-0.0019  | 0.78   | y=3.29x-0.0021   |
| propylene       | 0.92   | y=299.85x-0.12  | 0.86   | y=284.25x-0.004 | 0.76   | y=119.19x+0.027 | 0.51   | y=85.13x+0.099   |
| VOC             | May    |                 | Jun    |                 | Jul    |                 | Aug    |                  |
|                 | R      | equation        | R      | equation        | R      | equation        | R      | equation         |
| isoprene        | 0.94   | y=45.46x-0.024  | 0.96   | y=45.51x-0.0063 | 0.96   | y=45.36x-0.012  | 0.98   | y=55.49x-0.062   |
| styrene         | 0.44   | y=3.46x+0.0061  | 0.20   | y=3.49x+0.0018  | 0.59   | y=3.33x-0.0006  | 0.13   | y=0.68x+0.016    |
| cis-2-butene    | 0.48   | y=2.32x+0.0034  | 0.18   | y=2.29x+0.0012  | 0.58   | y=2.63x+0.018   | 0.12   | y=0.75x+0.025    |
| trans-2-butene  | 0.53   | y=4.53x+0.0081  | 0.35   | y=4.44x+0.0016  | 0.62   | y=3.27x+0.0087  | 0.12   | y=0.53x+0.013    |
| trans-2-pentene | 0.34   | y=1.06x-0.0001  | 0.27   | y=0.51x+0.0     | 0.38   | y=0.87x-0.0033  | 0.088  | y=0.155x+0.0024  |
| propylene       | 0.15   | y=18.69x+0.1026 | 0.0133 | y=26.40x+0.0207 | 0.0849 | y=6.32x+0.1298  | 0.0062 | y=2.33x+0.1432   |
| VOC             | Sep    |                 | Oct    |                 | Nov    |                 | Dec    |                  |
|                 | R      | equation        | R      | equation        | R      | equation        | R      | equation         |
| isoprene        | 0.98   | y=55.87x-0.049  | 0.72   | y=14.47x+0.025  | 0.90   | y=9.66x+0.0064  | 0.93   | y=7.28x+0.011    |
| styrene         | 0.17   | y=0.70x+0.014   | 0.93   | y=13.18x-0.0076 | 0.97   | y=14.88x-0.0    | 0.98   | y=16.49x-0.0012  |
| cis-2-butene    | 0.096  | y=0.42x+0.016   | 0.89   | y=8.24x+0.0007  | 0.94   | y=9.15x-0.0022  | 0.93   | y=7.56x-0.0042   |
| trans-2-butene  | 0.16   | y=0.49x+0.0039  | 0.90   | y=9.81x-0.010   | 0.90   | y=8.69x-0.0067  | 0.88   | y=7.08x-0.0086   |
| trans-2-pentene | 0.068  | y=0.10x+0.0019  | 0.88   | y=5.42x-0.0067  | 0.94   | y=6.03x-0.0042  | 0.91   | y=5.82x-0.0038   |
| propylene       | -0.055 | y=-0.23x+0.17   | 0.78   | y=86.00x+0.018  | 0.86   | y=123.56x+0.058 | 0.78   | y=184.23x+0.0045 |

**Table S4.** Correlation coefficients and fitting equations between VOC concentrations and the actual NO<sub>3</sub> reactivity towards VOC (including monoterpenes) in each month (where y represents VOC concentrations (ppbv), x represents the actual reactivity (s<sup>-1</sup>)). The indicators and corresponding parameterization equations are colored.

| VOC             | Jan  |                 | Feb   |                | Mar  |                | Apr    |                 |
|-----------------|------|-----------------|-------|----------------|------|----------------|--------|-----------------|
|                 | R    | equation        | R     | equation       | R    | equation       | R      | equation        |
| isoprene        | 0.88 | y=2.55x+0.010   | 0.89  | y=2.79x+0.0044 | 0.84 | y=2.05x+0.0074 | 0.5431 | y=1.71x+0.014   |
| styrene         | 0.76 | y=0.78x+0.0064  | 0.68  | y=0.79x+0.0041 | 0.68 | y=2.47x+0.0089 | 0.7515 | y=4.35x+0.0025  |
| cis-2-butene    | 0.71 | y=3.0469x+0.014 | 0.61  | y=3.17x+0.0089 | 0.72 | y=1.33x+0.0021 | 0.7151 | y=1.55x+0.0028  |
| trans-2-butene  | 0.80 | y=3.08x-0.0012  | 0.79  | y=2.43x-0.0014 | 0.67 | y=1.50x+0.0033 | 0.4244 | y=1.31x+0.010   |
| trans-2-pentene | 0.83 | y=1.89x-0.0048  | 0.82  | y=1.33x-0.0031 | 0.81 | y=0.97x-0.0006 | 0.7981 | y=0.99x-0.0013  |
| propylene       | 0.76 | y=49.88x+0.044  | 0.73  | y=45.10x+0.079 | 0.54 | y=18.81x+0.10  | 0.4047 | y=20.16x+0.14   |
| VOC             | May  |                 | Jun   |                | Jul  |                | Aug    |                 |
|                 | R    | equation        | R     | equation       | R    | equation       | R      | equation        |
| isoprene        | 0.56 | y=14.57x+0.019  | 0.66  | y=20.88x+0.001 | 0.74 | y=22.32x+0.014 | 0.68   | y=22.10x+0.0086 |
| styrene         | 0.70 | y=2.27x+0.0029  | 0.45  | y=2.221x+0.001 | 0.49 | y=1.77x+0.0001 | 0.50   | y=0.97x+0.0071  |
| cis-2-butene    | 0.62 | y=1.33x+0.0024  | 0.27  | y=1.34x+0.0009 | 0.50 | y=1.50x+0.017  | 0.38   | y=0.82x+0.019   |
| trans-2-butene  | 0.45 | y=1.97x+0.0095  | 0.24  | y=2.24x+0.0019 | 0.50 | y=1.72x+0.0094 | 0.41   | y=0.71x+0.0066  |
| trans-2-pentene | 0.61 | y=0.84x-0.0019  | 0.45  | y=0.34x-0.0001 | 0.27 | y=0.38x-0.0023 | 0.37   | y=0.28x-0.0004  |
| propylene       | 0.21 | y=10.16x+0.097  | 0.069 | y=15.08x+0.018 | 0.19 | y=5.20x+0.11   | 0.19   | y=3.46x+0.11    |
| VOC             | Sep  |                 | Oct   |                | Nov  |                | Dec    |                 |
|                 |      | equation        | R     | equation       | R    | equation       | R      | equation        |
| isoprene        | 0.51 | y=11.88x+0.063  | 0.57  | y=2.31x+0.045  | 0.89 | y=2.69x+0.0078 | 0.93   | y=2.31x+0.0075  |
| styrene         | 0.52 | y=0.76x+0.0097  | 0.82  | y=2.28x+0.007  | 0.83 | y=3.69x+0.0076 | 0.88   | y=4.71x-0.0035  |
| cis-2-butene    | 0.43 | y=0.57x+0.012   | 0.81  | y=1.48x+0.009  | 0.90 | y=2.50x-0.0003 | 0.85   | y=2.19x-0.0056  |
| trans-2-butene  | 0.62 | y=0.72x-0.001   | 0.83  | y=1.78x-0.0007 | 0.88 | y=2.42x-0.0054 | 0.79   | y=2.02x-0.0096  |
| trans-2-pentene | 0.59 | y=0.30x-0.0007  | 0.84  | y=1.01x-0.0019 | 0.89 | y=1.63x-0.0027 | 0.88   | y=1.78x-0.006   |
| propylene       | 0.18 | y=2.37x+0.15    | 0.68  | y=14.70x+0.12  | 0.71 | y=29.93x+0.13  | 0.62   | y=47.06x+0.045  |



Ref:

- Ambrose JL, Mao H, Mayne HR, Stutz J, Talbot R, Sive BC. Nighttime nitrate radical chemistry at Appledore island, Maine during the 2004 international consortium for atmospheric research on transport and transformation. *Journal of Geophysical Research-Atmospheres* 2007; 112: 19.
- Atkinson R, Arey J. Atmospheric degradation of volatile organic compounds. *Chemical Reviews* 2003; 103: 4605-4638.
- Brown SS, Dube WP, Peischl J, Ryerson TB, Atlas E, Warneke C, et al. Budgets for nocturnal VOC oxidation by nitrate radicals aloft during the 2006 Texas Air Quality Study. *Journal of Geophysical Research-Atmospheres* 2011; 116: 15.
- Cheng X, Li H, Zhang YJ, Li YP, Zhang WQ, Wang XZ, et al. Atmospheric isoprene and monoterpenes in a typical urban area of Beijing: Pollution characterization, chemical reactivity and source identification. *Journal of Environmental Sciences* 2018; 71: 150-167.
- Li L, Wu F, Meng X. Seasonal and Diurnal Variation of Isoprene in the Atmosphere of Beijing. *Environmental Monitoring in China* 2013; 29: 120-124.
- Xie X, Shao M, Liu Y, Lu SH, Chang CC, Chen ZM. Estimate of initial isoprene contribution to ozone formation potential in Beijing, China. *Atmospheric Environment* 2008; 42: 6000-6010.
- Yin LY, 2012. I. Investigation on Atmospheric Volatile Organic Compounds of Different Types of Stations in North China. (Master thesis). , 2012.
